# Supplementary material for: Application of Orbitrap mass spectrometry to investigate seasonal variations of dissolved organic matter composition in a eutrophic lake in Japan
Source: Royal Society of Chemistry journal article supplement (doi:10.1039/d0ew00129e), 2020-01-01
Supplement: d0ew00129e1.pdf [file d0ew00129e1.pdf]

## Supplementary Figure

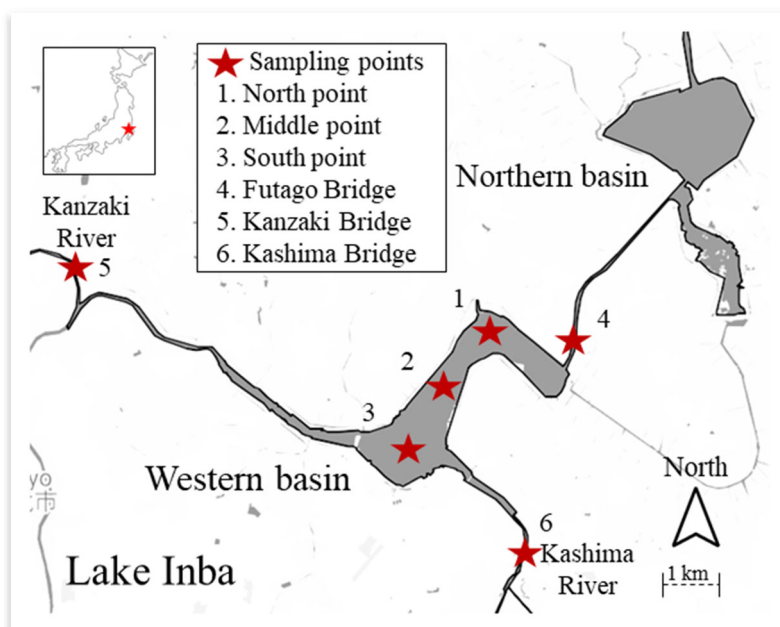

**Fig. S1** Sampling site of Lake Inba and inflow rivers

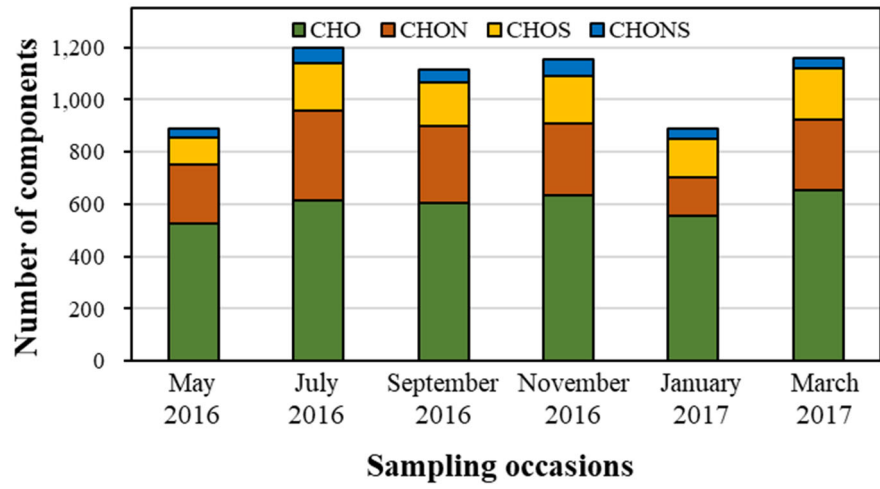

**Fig. S2** Compositions of DOM<sub>SPE</sub> components in water samples from Lake Inba.

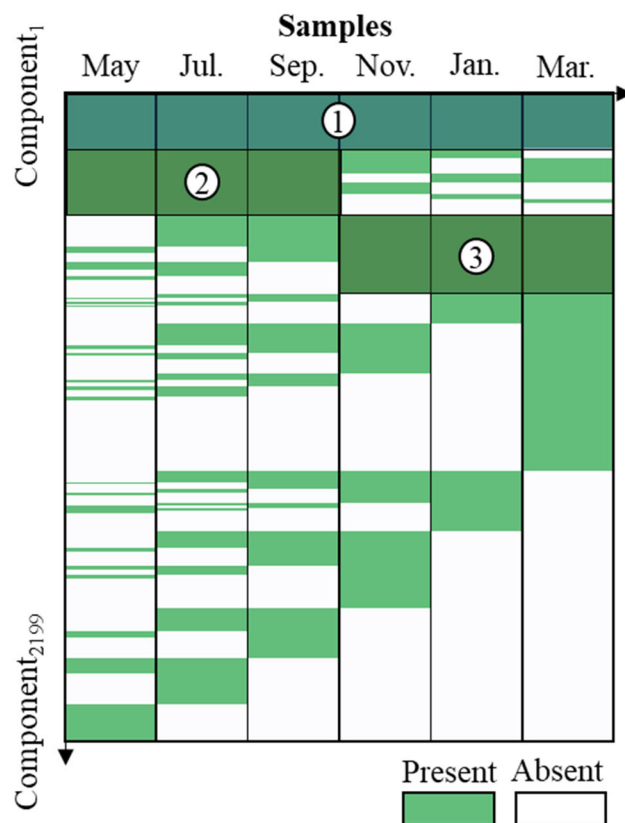

1. Components common in all samples (184 components)
2. Components common in May, Jul. and Sep. (224 components)
3. Components common in Nov., Jan., and Mar. (270 components)

**Fig. S3** Presence and absence of DOM<sub>SPE</sub> components in water samples from Lake Inba collected between May 2016 and March 2017.

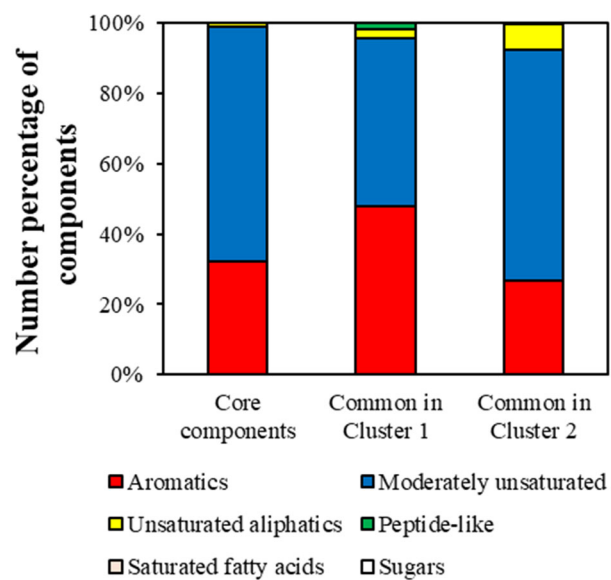

**Fig. S4** Classifications of clustered components based on number of heteroatoms, H/C, O/C and  $A_{i_{mod}}$

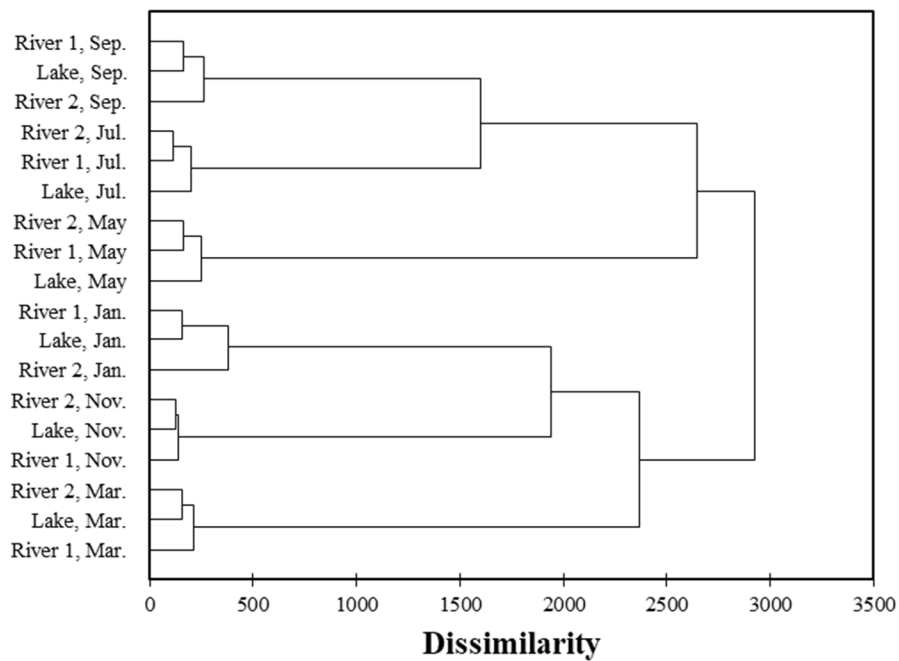

**Fig. S5** Cluster analysis of DOM<sub>SPE</sub> components in water samples from Lake Inba and two inflow rivers. These binary data were analyzed by Ward's method. Please note that Lake denotes Lake Inba, River 1 denotes Kashima River, and River 2 denotes Kanzaki River.

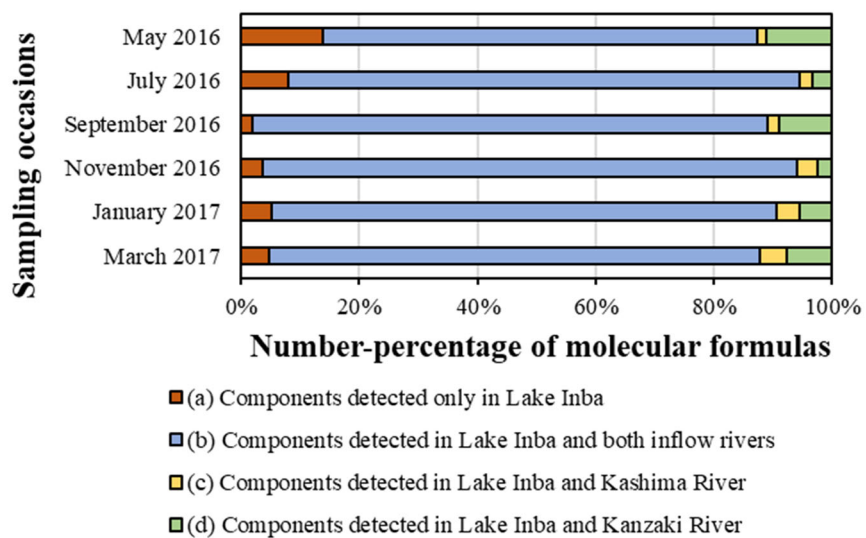

**Fig. S6** Categorization of DOM<sub>SPE</sub> components in water samples collected in Lake Inba into (a) components detected only in Lake Inba, (b) components detected in Lake Inba and both inflow rivers, (c) components detected in Lake Inba and Kashima River, and (d) components detected in Lake Inba and Kanzaki River.

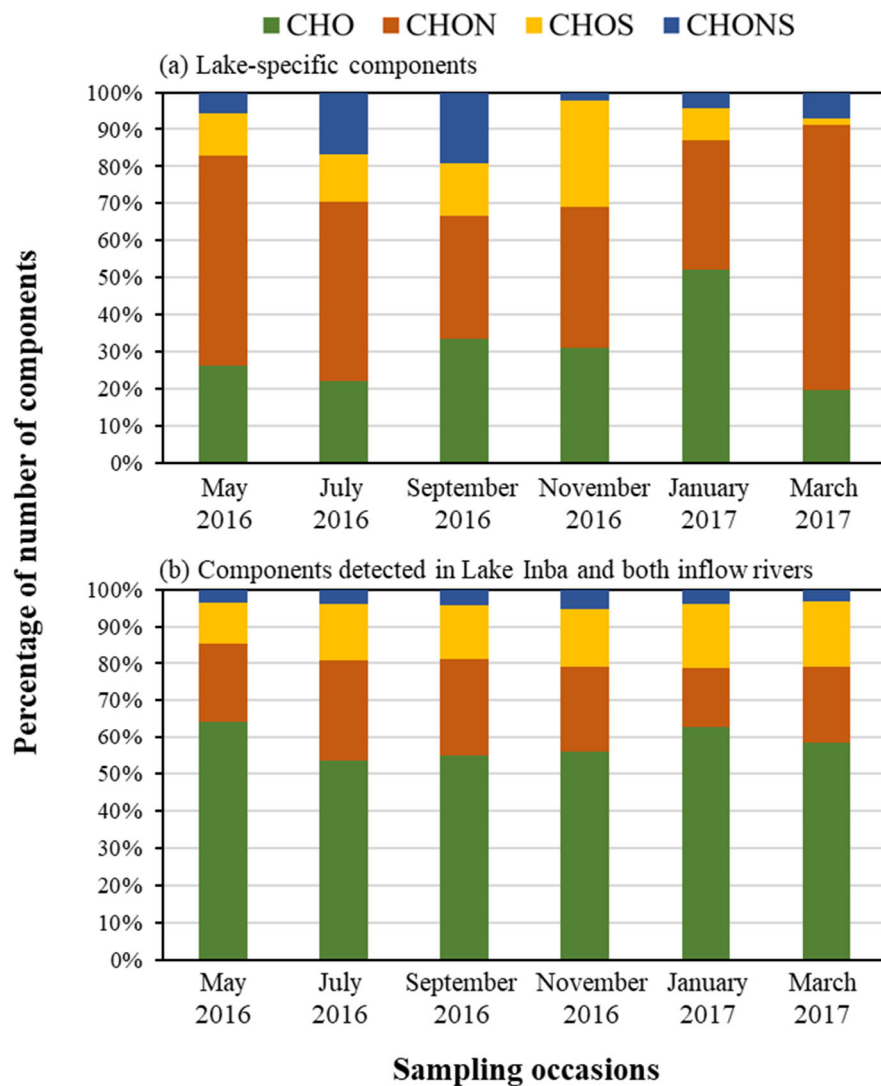

**Fig. S7** Composition of DOM<sub>SPE</sub> components in water samples from Lake Inba and two inflow rivers. (a) Lake-specific components. (b) Components detected in Lake Inba and both inflow rivers.

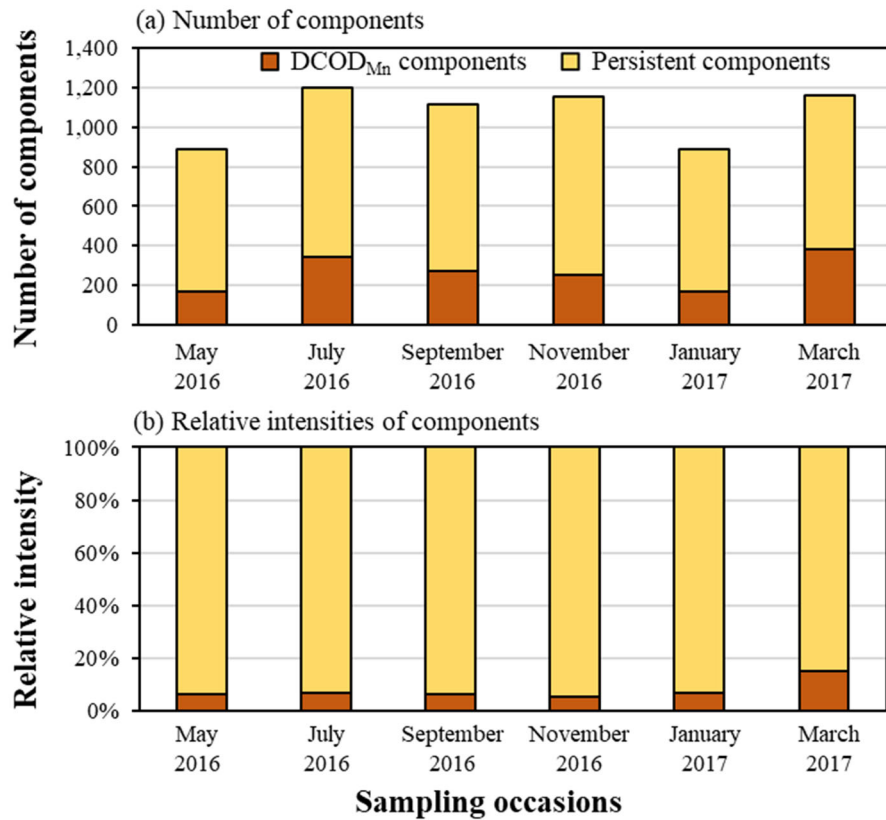

**Fig. S8** Classification of DOM<sub>SPE</sub> components into components responsible for DCOD<sub>Mn</sub> and persistent components, based on (a) the number of components and (b) relative intensities of the components.



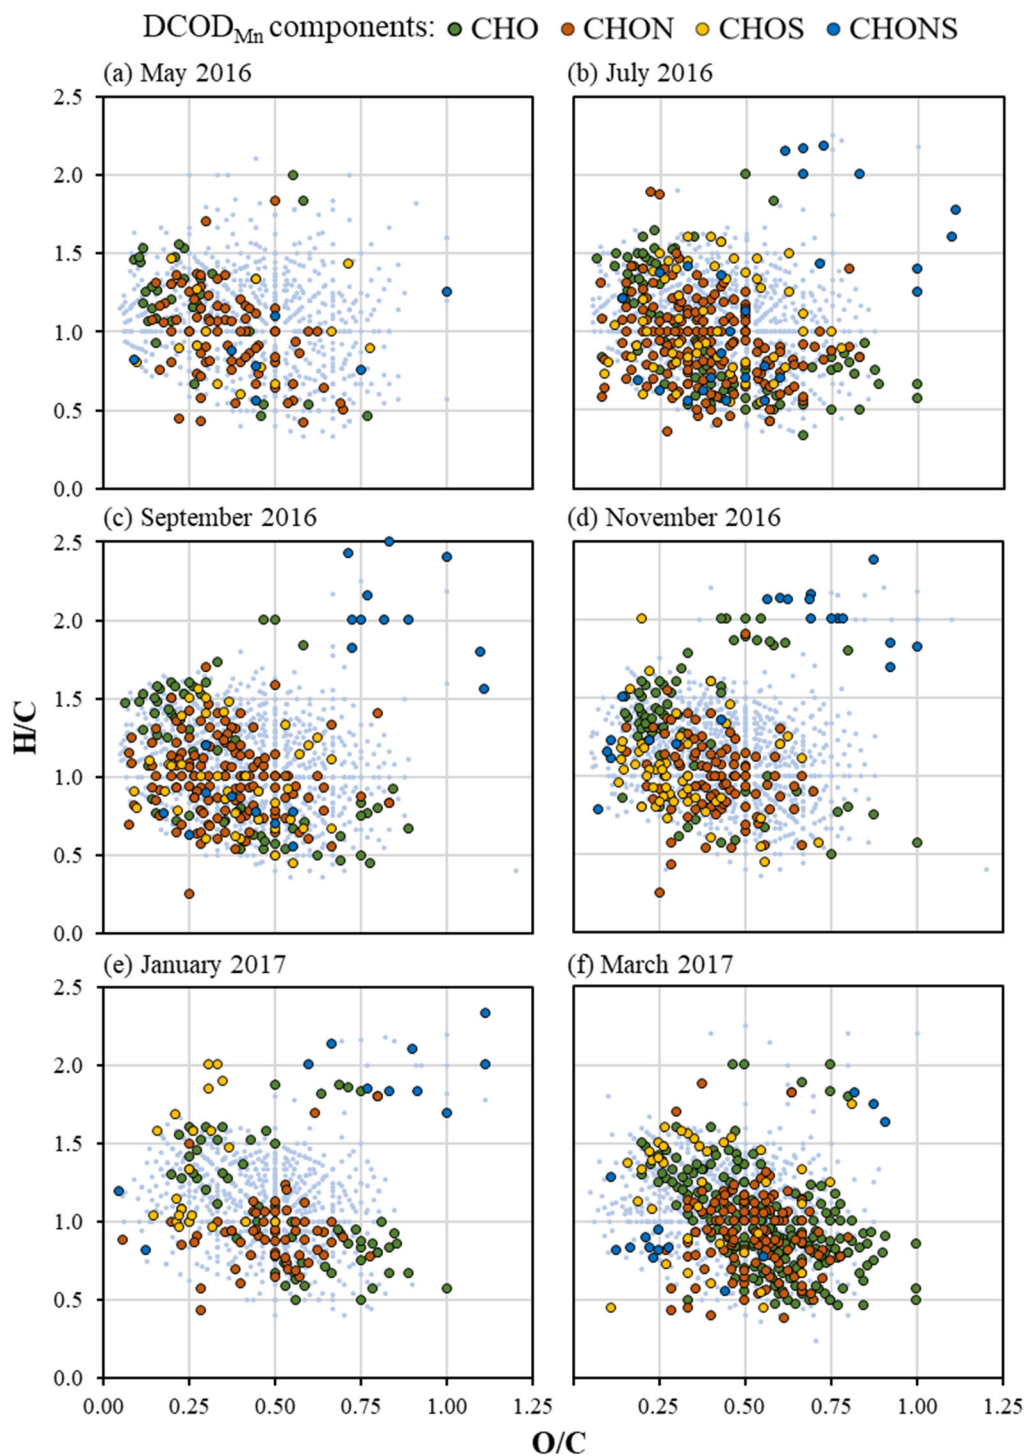

**Fig. S9** van Krevelen diagrams of DCOD<sub>Mn</sub> components (colored circles) and persistent components (dim-colored circles) detected in water samples from Lake Inba collected in (a) May 2016, (b) July 2016, (c) September 2016, (d) November 2016, (e) January 2017, and (f) March 2017.

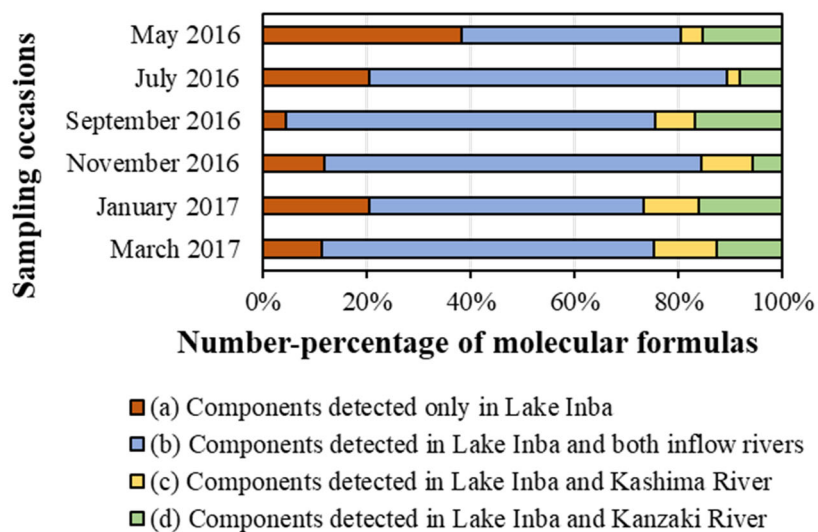

**Fig. S10** Categorization of DCOD<sub>Mn</sub> components detected in water samples from Lake Inba: (a) components detected only in Lake Inba, (b) components detected in Lake Inba and Kashima River, (c) components detected in Lake Inba and Kanzaki River, and (d) components detected in Lake Inba and both inflow rivers.

## Supplementary Tables

**Table S1** Water quality parameters for Lake Inba samples collected between May 2016 and March 2017

| Lake water samples | TOC (mg L <sup>-1</sup> ) | DOC (mg L <sup>-1</sup> ) | TCOD <sub>Mn</sub> (mg L <sup>-1</sup> ) | DCOD <sub>Mn</sub> (mg L <sup>-1</sup> ) | UV <sub>254</sub> (cm <sup>-1</sup> ) | SUVA (L mg <sup>-1</sup> m <sup>-1</sup> ) | Chl-a (µg L <sup>-1</sup> ) |
|--------------------|---------------------------|---------------------------|------------------------------------------|------------------------------------------|---------------------------------------|--------------------------------------------|-----------------------------|
| May 2016           | 9.5                       | 3.4                       | 12.3                                     | 4.1                                      | 0.093                                 | 2.7                                        | 289.4                       |
| July 2016          | 5.9                       | 4.0                       | 9.3                                      | 3.9                                      | 0.101                                 | 2.5                                        | 113.7                       |
| September 2016     | 3.9                       | 2.7                       | 6.1                                      | 3.5                                      | 0.081                                 | 3.0                                        | 53.9                        |
| November 2016      | 3.4                       | 2.2                       | 5.4                                      | 2.5                                      | 0.050                                 | 2.2                                        | 78.0                        |
| January 2017       | 4.8                       | 2.1                       | 6.4                                      | 2.7                                      | 0.050                                 | 2.4                                        | 68.0                        |
| March 2017         | 4.6                       | 2.4                       | 8.4                                      | 1.9                                      | 0.044                                 | 1.8                                        | 100.9                       |

**Table S2** Number-averaged double bond equivalent minus oxygen (DBE-O<sub>n</sub>) of DCOD<sub>Mn</sub> and persistent components.

|                                  | May<br>2016 | July<br>2016 | September<br>2016 | November<br>2016 | January<br>2017 | March<br>2017 |
|----------------------------------|-------------|--------------|-------------------|------------------|-----------------|---------------|
| DCOD <sub>Mn</sub><br>components | 3.32        | 2.89         | 2.84              | 2.17             | 0.91            | 0.96          |
| Persistent<br>components         | 1.37        | 1.52         | 1.44              | 1.01             | 0.65            | 1.16          |

**Table S3** Number-averaged modified aromaticity index ( $AI_{\text{mod},n}$ ) of  $DCOD_{Mn}$  and persistent components.

|                           | May<br>2016 | July<br>2016 | September<br>2016 | November<br>2016 | January<br>2017 | March<br>2017 |
|---------------------------|-------------|--------------|-------------------|------------------|-----------------|---------------|
| $DCOD_{Mn}$<br>components | 0.57        | 0.53         | 0.55              | 0.41             | 0.41            | 0.45          |
| Persistent<br>components  | 0.44        | 0.42         | 0.41              | 0.37             | 0.36            | 0.40          |
